1 **Availability of Priority Maternal and Newborn Health Indicators: Cross-sectional**  
2 **Analysis of Pregnancy, Childbirth and Postnatal Care Registers from 21 Countries**

3 Authors: \*Mark Kabue<sup>1</sup>, Francesca Palestra<sup>2</sup>, Elizabeth Katwan<sup>2</sup>, Allisyn C. Moran<sup>2</sup>

4 *Affiliations:* (1) Jhpiego, Johns Hopkins University affiliate; (2) WHO, Department of Maternal, Newborn,  
5 Child, Adolescent Health and Aging.

6 *Corresponding author:* Mark Kabue Email: [Mark.Kabue@jhpiego.org](mailto:Mark.Kabue@jhpiego.org)

7 **Abstract**

8 **Background:** Data from national health management information systems (HMIS) are essential  
9 for routinely tracking progress toward national and subnational objectives, programmatic  
10 decision-making, planning and review, and ultimately to improve quality of care. It is through an  
11 in-depth understanding of the data elements captured in patient registers, as building blocks of  
12 national HMIS indicators, that it is possible to improve standardization in data collection and  
13 measurement of key indicators to help track progress towards achieving maternal and newborn  
14 health goals.

15 **Methods and findings:** This analysis was done through a review of antenatal (ANC), childbirth  
16 and postnatal (PNC) registers from 21 countries across five world regions. Between July and  
17 October 2020, various country-based maternal and newborn experts, implementing agencies,  
18 program managers, and ministries of health personnel were contacted and requested to share  
19 the current versions of the registers. Both paper-based and electronic registers were obtained.  
20 Twenty ANC registers, eighteen childbirth and thirteen PNC were analyzed. Both longitudinal and  
21 cross-sectional ANC and PNC registers were reviewed, while the childbirth registers included in  
22 the review were all cross-sectional. For the ANC registers 11/20 (55%) and for PNC registers 7/13  
23 (54%) were longitudinal. In four countries the registers were electronic (Norway, Sweden, USA,  
24 West-Bank - Palestine), while the rest was paper-based. There was great variation in the number

25 of data elements included from each register reviewed ranging from 24 in Nepal’s childbirth  
26 register to 188 in Eswatini’s ANC register. These findings are presented in four broad categories  
27 (Pregnancy, Childbirth, Postnatal care, and Mortality outcomes), with subheadings in each  
28 category.

29 **Conclusion:** This analysis highlights some areas in where there are data gaps as we work to  
30 reduce preventable maternal, newborn deaths and stillbirths and deliver high-quality, equitable  
31 care. Programme managers and health workers need this data to monitor the performance of  
32 their national health system and to guide the continuous improvement of health care services  
33 for women and newborns. The results of this analysis will complement additional work and help  
34 to inform the standardization of pregnancy and childbirth registers and provide information for  
35 other countries seeking to introduce indicators in their health systems.

36

## 37 **Introduction**

38 The global burden of maternal deaths is estimated at 810 women dying each day from  
39 preventable conditions related to pregnancy and childbirth<sup>1,2</sup>. Although there was 38% reduction  
40 in the maternal mortality ratio (MMR) between 2000 and 2017, the current MMR of 211 deaths  
41 per 100,000 live births remains unacceptably high especially, with two-thirds of the deaths  
42 occurring in low-to middle- income countries (LMICs)<sup>1</sup>. At the same time, the number of stillbirths  
43 is rising especially in Sub-Saharan Africa, increasing from 0.77 million in 2000 to 0.82 million in  
44 2019. In some high-income countries – despite very low levels of neonatal mortality – more  
45 stillbirths than neonatal deaths occur, and in some cases, even surpass the number of infant  
46 deaths.<sup>2,3</sup>. Most maternal and newborn deaths are preventable if proper preventive measures

47 are in place. In many settings poor quality of care is a greater contributor to poor health outcomes  
48 than care coverage and it is estimated that about half of the maternal deaths and 58% of the  
49 newborn deaths could be averted with quality health care<sup>4</sup>. Maternal and newborn mortality is  
50 considered to be proxy indicator of limited access to quality healthcare service delivery in a  
51 population. Avoidable maternal and newborn health inequalities arise because of the socio-  
52 cultural and socio-eco- political circumstances in which a woman and her newborn grow, live,  
53 work, and age, and the systems put in place to deal with illness<sup>5</sup>.

54 The data needed for routine program implementation monitoring and evaluation are gathered  
55 through a variety of modalities, with health facility registers being an important source of  
56 information to document events around antenatal care (ANC), childbirth, and postnatal care  
57 (PNC), hence the need to periodically assess their content and utility<sup>6</sup>. However, there are  
58 challenges related to using the current disjointed data collection and reporting systems which in  
59 part included focus on meeting the needs of specific funders, poorly developed health  
60 information systems (HIS), and inadequate human resources capacity<sup>7</sup>. Furthermore, health data  
61 are often recorded and/or collated by clinicians who have to deal with high patient caseloads  
62 especially those working in the public sector, which might lead to staff burnout, compromised  
63 data quality and well-being of the patients<sup>8</sup>. Health facility data have been reported to have  
64 many shortcomings which include poor quality, inaccuracies, incompleteness and not reporting  
65 on time through the routine health information systems<sup>9-16</sup>.

66 National health management information systems (HMIS) are also essential for decision-making  
67 aiming to improve the quality of care, and routinely tracking progress toward national and  
68 subnational objectives, including patient management objectives, for which data cannot be

69 collected otherwise<sup>17</sup>. The majority of national maternal and newborn health indicators can be  
70 reported through the HIS (and are used by countries to track their progress toward local and  
71 national goals). One such commonly used indicator which serves as a marker of service utilization  
72 is proportion of women attending at least four ANC visits during pregnancy. Data elements used  
73 to compute this indicator are captured at the facility level and reported monthly by all facilities  
74 using the established reporting channels in the country, often flowing from facility to subnational  
75 and then to national level, with consolidation of data along at the national level<sup>19,20</sup>.

76 RHIS is often weak in most low- and middle-income countries, with limitations in the representativeness  
77 and quality of routine and health facility data<sup>17</sup>. In many LMICs countries, routine data are captured  
78 through use of printed paper registers, and only available through electronic platforms in  
79 summary form, using software such as the district health information system (DHIS2)<sup>21,22</sup>. On the  
80 other hand, high-income countries such as Denmark, Norway, Sweden, and United States of  
81 America have robust electronic data capture systems<sup>23-26</sup>.

82 Analysis of antenatal care , childbirth and postnatal care registers is an important step towards  
83 gaining a deeper understanding of key data elements related to maternal and newborn health in  
84 the national HMIS across the world with a view towards promoting standardization in data  
85 collection, analysis, and use<sup>27</sup>. This paper reports on analysis of key data elements in registers of  
86 countries whose data sources were collected and reviewed, describes differences in the way data  
87 elements are captured, and highlights opportunities for inclusion of some critical data elements  
88 that are not currently collected in registers.

89

## 90 **Methodology**

91 The approach used in this review of registers was informed by previous similar work that focused  
92 on maternal, newborn and child survival<sup>13,27</sup>. Selection of the countries to be included in the  
93 review was guided by the findings of literature review conducted prior to embarking on the  
94 analysis of the registers as well as the availability of the records. Countries included in this review  
95 had some literature published related to antenatal care, childbirth, or postnatal care registers. A  
96 few countries especially those from regions where published literature was not available, were  
97 added to the list to present a more global perspective, taking into account the geographical  
98 distribution. In the end, twenty-one countries drawn from five regions (Africa, Europe, South-  
99 East Asia, Eastern Mediterranean, and the Americas), were included in the review (Table 1).

## 100 ***Gathering the Registers***

101 Between July and October 2020, various country-based maternal and newborn experts,  
102 implementing agencies, program managers, and ministries of health personnel were contacted  
103 and requested to share the current versions of the ANC, childbirth, and PNC registers available  
104 to them. These materials were shared in various formats such Microsoft Excel and Word,  
105 portable document format (PDF), images, and links to websites. Both paper-based and  
106 electronic registers were obtained from 21 countries through different methods, primarily  
107 electronically. For the paper-based registers, the years of their production ranged from  
108 between 2015 to 2020. For some of the electronic registries, no specific dates could be assigned  
109 to when they were produced. However, majority had some time-periods documented in  
110 various ways; for example, the medical birth register of Sweden reviewed spans the period  
111 1967 to 2018<sup>23,24,28</sup>.

112

113 For materials that were not in English, these were translated into English prior to review and  
114 data abstraction. Since the registers are revised periodically, the most recent versions of the  
115 documents available for each country were analyzed. The ANC and PNC registers reviewed  
116 were in both cross-sectional and longitudinal (i.e. All visits for an individual recorded on the  
117 same page in the register) formats. 11/20 (55%) of ANC registers and 7/13 (54%) of PNC  
118 registers analyzed were longitudinal. All childbirth registers reviewed were cross-sectional  
119 (table 1). Registers even from the same country were not linked to each other; they were siloed  
120 by the type of care.

121

122

123 **Table 1: Countries whose registers were included in the review**

|    | Country               | WHO Region            | Version-year of registers | Format: Paper or Electronic | Antenatal care registers | Postnatal care registers |
|----|-----------------------|-----------------------|---------------------------|-----------------------------|--------------------------|--------------------------|
| 1  | Afghanistan           | Eastern Mediterranean | 2018                      | Paper                       | L*                       | L                        |
| 2  | Argentina             | Americas              | 2018                      | Paper                       | L                        | X**                      |
| 3  | Bolivia               | Americas              | 2018                      | Paper                       | X                        |                          |
| 4  | Burkina Faso          | Africa                | Unspecified               | Paper                       |                          | X                        |
| 5  | Eswatini              | Africa                | 2015/6                    | Paper                       | L                        | L                        |
| 6  | Ghana                 | Africa                | 2015                      | Paper                       | X                        | L                        |
| 7  | Guyana                | Americas              | 2015                      | Paper                       | L                        |                          |
| 8  | Indonesia             | South-East Asia       | 2019                      | Paper                       | L                        | L                        |
| 9  | Kenya                 | Africa                | 2019                      | Paper                       | X                        | X                        |
| 10 | Malawi                | Africa                | 2018                      | Paper                       | L                        | L                        |
| 11 | Nepal                 | South-East Asia       | Unspecified               | Paper                       | X                        |                          |
| 12 | Nigeria               | Africa                | 2019                      | Paper                       | X                        | X                        |
| 13 | Norway                | Europe                | 2018                      | Electronic                  | L                        | L                        |
| 14 | South Sudan           | Africa                | 2015                      | Paper                       | X                        | X                        |
| 15 | Sweden                | Europe                | 2016                      | Electronic                  | L                        |                          |
| 16 | Tanzania              | Africa                | 2019                      | Paper                       | X                        | X                        |
| 17 | Uganda                | Africa                | 2019                      | Paper                       | X                        |                          |
| 18 | USA                   | Americas              | N/A                       | Electronic                  | L                        |                          |
| 19 | West Bank - Palestine | Eastern Mediterranean | N/A                       | Electronic (Pilot)          | L                        |                          |
| 20 | Zimbabwe              | Africa                | 2019                      | Paper                       | X                        |                          |
| 21 | Zambia                | Africa                | 2020                      | Paper                       | L                        | L                        |

124 \*L denotes longitudinal register; \*\*X denotes cross-sectional register. Grey areas indicate that the  
 125 registers were not available for analysis.

126 ***Capturing the Data Elements***

127 A Microsoft Excel worksheet was used to store key data elements manually extracted from  
128 each register for each country. These data included; name of the data source, year of  
129 production, format (cross-sectional or longitudinal), and the data elements contained. For each  
130 country file, separate worksheets were generated for ANC, childbirth (or labour and delivery),  
131 and PNC data elements. Thereafter, all data elements contained in the register were marked  
132 under the appropriate worksheets, organized in logical sections such as demographics, medical  
133 history, laboratory investigations, client outcomes and/or services offered. Abstraction of the  
134 information was done in a standardized manner by one person (MK) over a period of three  
135 months. Data quality checks were conducted through a second review of select registers from  
136 the 21 countries.

137 ***Analysis and Synthesis of Content***

138 Following completion of the data abstraction into the individual country worksheet, a summary  
139 file with three worksheets (ANC, childbirth, PNC) was generated. This process was done in a  
140 stepwise manner as follows:

141  
142 **Step 1** – Five categories were generated for summarizing the data, and corresponding  
143 worksheets in the Microsoft Excel file generated: Pregnancy, Lab tests and investigations, Birth  
144 outcomes and treatment, and PNC.

145 **Step 2** - Country names were listed alphabetically, forming the rows.

146 **Step 3** - The column headings were generated by identifying the common data elements  
147 present in a majority of the registers. Some key data elements that are either denominators or



148 numerators of key maternal and newborn health indicators were also included, whether they  
149 were present in many registers or not..

150 **Step 4** – Summary data were captured from each country file by marking a “check” in the  
151 appropriate cell if the data element or term listed on the column heading was present in the  
152 country file.

153 **Step 5** – The content of the data elements captured was further categorized into logical  
154 categories, guided by standard definitions of key maternal and newborn indicators.

155 **Step 6** – As the process of capturing the summary data progressed, some data elements were  
156 added and steps 3-5 were reviewed, with corresponding adjustments being made to the data  
157 summary categories identified.

158 **Step 7** – Sub-analysis of registers from four countries (Ghana, Kenya, Nigeria, and Zambia)  
159 across two time periods (2017/8 and 2019/20) was done to identify changes in format and  
160 content or data elements included. These countries were selected because data on their  
161 registers were available from prior similar review conducted in 2018<sup>11</sup>; this enabled  
162 comparison of data between two points in time. We looked for the presence or absence of  
163 twenty-seven data elements that are critical to monitoring maternal and newborn services  
164 across the continuum of care, from pregnancy to PNC.

165

166

## 167 **Results**

168 The findings on the analysis of the similarities and differences on how key data elements are  
169 captured in different registers from 21 countries are presented. There was great variation in the

170 number of data elements included from each document reviewed ranging from 24 in Nepal’s  
171 delivery register to 188 in Eswatini’s ANC register. These findings are presented in three broad  
172 categories (Pregnancy, Childbirth, Postnatal care, and Mortality outcomes), with subheadings in  
173 each category.

## 174 ***Pregnancy***

175 Of the 20 countries whose ANC registers were reviewed, age, name of the woman, ANC number  
176 assigned at the facility or a personal identifier, and residential address were the most  
177 commonly recorded data elements (Figure 1). In a few countries, information on the husband  
178 or baby’s father including name (Afghanistan) and citizenship (Sweden) is recorded. Some  
179 other vital information recorded, usually during the first ANC visit, include woman’s relevant  
180 medical history such as hypertension and diabetes in 13/20 (65%) of the countries, and  
181 complications from past pregnancies in 7/20 (35%) of the countries. Recording of behavioural  
182 or practices such as smoking, use of alcohol or drugs is documented in in five countries, all  
183 located either in Europe or the Americas.

## 184 185 **Figure 1: Client registration and baby’s father’s information**

186  
187 *(INSERT FIGURE 1 HERE)*  
188

## 189 ***Utilization of antenatal care services***

190 Countries that used longitudinal ANC registers routinely document between five and eight or  
191 more visits, whereas those using electronic formats (Norway, Sweden, USA, and West Bank –  
192 Palestine), have capacity to record many more visits, one visit per row. For the countries using  
193 cross-sectional registers, they record the first visit as “New visit” and subsequent visits in a

194 separate column as “Revisit”. In some cases, the actual visit number was entered, for example  
195 3<sup>rd</sup> visit, while in some cases, there was a column to capture 4+ visits in 8/20 countries.

### 196 *Routine examination during ANC visits*

197 During each ANC visit, a variety of measurements are taken and recorded, allowing for  
198 comparison of a current visit to previous visits in order to identify or monitor possible early  
199 danger signs. In over half of the countries examined, routine data elements recorded during a  
200 given visit included: gestational age, blood pressure, weight, height, and haemoglobin level or  
201 pallor/ anaemia. The less commonly recorded parameters included: fetal heart tones/sounds,  
202 presentation of the baby, and the mother’s nutrition status (Table 2).

203 **Table 2: Key measurements during antenatal care visits**

| Country               | Gestation age (weeks) | Fundal height | Fetal heart tones | Fetal presentation / Cervix exam | Blood pressure | Weight | Height | Nutrition status / MUAC <sup>a</sup> | Hb <sup>b</sup> level/ Anemia |
|-----------------------|-----------------------|---------------|-------------------|----------------------------------|----------------|--------|--------|--------------------------------------|-------------------------------|
| Afghanistan           | X                     | X             | X                 |                                  | X              | X      |        |                                      | X                             |
| Argentina             | X                     |               |                   | X                                |                | X      | X      |                                      | X                             |
| Bolivia               |                       |               |                   |                                  |                | X      | X      | X                                    |                               |
| Eswatini              | X                     |               |                   |                                  | X              | X      |        | X                                    | X                             |
| Ghana                 | X                     | X             | X                 | X                                | X              | X      |        |                                      |                               |
| Guyana                | X                     | X             |                   |                                  | X              | X      | X      |                                      | X                             |
| Indonesia             | X                     |               |                   |                                  | X              | X      | X      | X                                    | X                             |
| Kenya                 |                       |               |                   |                                  | X              | X      | X      | X                                    | X                             |
| Malawi                | X                     | X             | X                 |                                  |                | X      |        |                                      | X                             |
| Nepal                 |                       |               |                   | X                                |                |        |        |                                      |                               |
| Nigeria               | X                     |               |                   |                                  | X              | X      | X      |                                      | X                             |
| Norway                | X                     |               | X                 |                                  | X              | X      | X      |                                      |                               |
| South Sudan           |                       |               |                   |                                  | X              | X      | X      |                                      | X                             |
| Sweden                | X                     |               |                   | X                                |                | X      |        |                                      |                               |
| Tanzania              |                       |               |                   |                                  |                |        | X      | X                                    | X                             |
| Uganda                | X                     | X             | X                 |                                  | X              | X      |        | X                                    | X                             |
| USA                   | X                     | X             | X                 | X                                |                |        |        |                                      |                               |
| West Bank - Palestine | X                     | X             |                   | X                                | X              |        |        |                                      | X                             |
| Zambia                | X                     |               |                   |                                  | X              | X      | X      |                                      | X                             |
| Zimbabwe              | X                     | X             | X                 | X                                | X              | X      | X      | X                                    | X                             |

204 *a. MUAC - Mid-Upper Arm Circumference; b. Hb - Haemoglobin*

205 ***Malaria in pregnancy***

206 In countries where malaria is endemic, documentation of the doses of intermittent preventive  
 207 treatment in pregnancy (IPTP) for management of malaria in pregnancy was included in 7/20  
 208 (35%) of the registers reviewed. Four of the seven countries document at least four doses while  
 209 the other three record three doses. Provision of bed nets was included in 9/20 (45%) of the ANC  
 210 registers reviewed (Table 3). Two countries had columns to document malaria treatment  
 211 provided.

212 **Table 3: IPTp doses, Malaria Treatment and Bednets**

| Country     | IPTp1 | IPTp2 | IPTp3 | IPTp 4 or more | Malaria treatment | LLIN/ ITN provided |
|-------------|-------|-------|-------|----------------|-------------------|--------------------|
| Afghanistan | X     | X     | X     | X              | X                 | X                  |
| Ghana       | X     | X     | X     |                |                   | X                  |
| Indonesia   |       |       |       |                | X                 | X                  |
| Kenya       | X     | X     | X     |                |                   | X                  |
| Malawi      | X     | X     | X     |                |                   | X                  |
| Nigeria     | X     | X     | X     | X              |                   | X                  |
| South Sudan |       |       |       |                |                   | X                  |
| Tanzania    | X     | X     | X     | X              |                   |                    |
| Uganda      |       |       |       |                |                   | X                  |
| Zambia      | X     | X     | X     | X              |                   | X                  |

213 *Prevention of mother to child transmission (PMTCT) of HIV and STIs*

214 Pregnancy is a period when specific measures can be taken to prevent a baby born to a HIV-  
 215 infected woman from being infected. In addition, screening and treating mothers with sexually  
 216 transmitted diseases like syphilis can protect the baby from such infections both in-utero or  
 217 after birth. The HIV status of the mother was documented in 10/20 (50%) of countries where  
 218 ANC registers were reviewed. ANC registers from nine countries (45%) document whether the  
 219 mother is on antiretroviral therapy (ART). Three countries (Eswatini, Kenya, and Uganda)  
 220 document the WHO stage of disease. The same three countries also have space to document  
 221 whether the pregnant woman is on cotrimoxazole to prevent opportunistic infections.  
 222 Regarding syphilis, 7/20 (35%) of the countries record treatment of syphilis (Table 4).

223

224 *Nutrition and micronutrients supplementation*

225 Nutrition interventions are key to ensuring the good health of the mother and normal growth  
 226 of the unborn baby. Provision of health promotion and prevention messages to the mother  
 227 through nutrition counseling is documented in 9/20 (45%) of the countries. Regarding

228 micronutrients, six countries document provision of iron and folate supplementation separately  
229 (Guyana, Indonesia, Kenya, Norway, Tanzania, Uganda, and Zambia), while eight countries have  
230 them combined in one column. Provision of Vitamin A and calcium are recorded in one country  
231 each, Norway and Zimbabwe, respectively. Related to nutrition, deworming is recorded in only  
232 six countries (Figure 2).

233 **Figure 2: Nutrition supplementation and counseling**

234

235 *(INSERT FIGURE 2 HERE)*

236

237 *Family planning counselling and screening*

238 Family planning counseling provided during pregnancy was documented in five countries. At  
239 the same time, discussion around the birth plan is recorded in five countries (Afghanistan,  
240 Argentina, Sweden, USA, and Zimbabwe). Screening for gender-based violence (GBV) is  
241 documented in Afghanistan, while breast cancer screening through physical examination is  
242 recorded in Zambia.

243 *Routine Laboratory tests and other investigations done during ANC*

244 Majority of the countries capture data on laboratory tests and investigations conducted  
245 routinely most of them during each ANC visit. The most commonly recorded tests in the  
246 countries reviewed are: hemoglobin level; Syphilis testing; Urinalysis for sugar or proteins; HIV  
247 test ; and blood grouping as shown in table 4. Six countries document Tuberculosis screening.  
248 Hepatitis B testing is recorded in four countries. Pap smear is one of the investigations done  
249 that are documented only three countries. Ultrasound and status of the baby is recorded in six  
250 countries.

251 ***Childbirth***

252 The care received by the mother from the moment of admission to discharge after delivery is  
253 recorded mostly in a maternity register. However, some other information such as the personal  
254 identifying information of the mother medical history is recorded in supplemental documents  
255 such as ANC card or other records retained by the client. The estimated date of delivery and  
256 last known menstrual period dates are not consistently documented in the maternity register.

257 ***Monitoring of mother and the fetus during labor***

258 Eighteen country childbirth registers or source documents were reviewed. The information  
259 captured in the registers distinguished between vaginal deliveries, assisted deliveries, and  
260 cesarean section deliveries in the register. Information in the register on whether a partograph  
261 was used is recorded in four countries, as shown in table 5.

262 The data elements in the partograph were not part of this review. Use of a uterotonics  
263 (Oxytocin, Ergometrine or Misoprostol) immediately after delivery is documented in 11/18  
264 (61%) countries, while use of magnesium sulphate in the management of pre-eclampsia/  
265 Eclampsia is recorded in three countries. Complications of Childbirth are documented in 14/18  
266 (78%) countries. The complications documented include vaginal tears, blood loss or need for  
267 transfusion, retained placenta, obstructed, or prolonged labor, ruptured uterus, and sepsis  
268 (Figure 3).

269  
270 **Figure 3: Maternal complications of childbirth**

271  
272 *(INSERT FIGURE 3 HERE)*

273 **Table 4: Screening and testing performed during antenatal care visits**

| Country*              | Urinalysis | Hb test | Blood sugar | Blood group | Rh factor | Syphilis Testing | HIV Testing | Hep. B Testing | CD4 Count: | VL | Partner HIV Testing: | HIV Couple Testing: | Malaria testing | TB test | Pap Smear | Ultrasound |
|-----------------------|------------|---------|-------------|-------------|-----------|------------------|-------------|----------------|------------|----|----------------------|---------------------|-----------------|---------|-----------|------------|
| Afghanistan           | X          | X       | X           | X           | X         | X                |             |                |            |    |                      |                     |                 | X       |           |            |
| Argentina             | X          | X       | X           | X           | X         |                  | X           |                |            |    |                      |                     |                 |         |           |            |
| Bolivia               |            |         |             |             |           |                  |             |                |            |    |                      |                     |                 |         | X         |            |
| Eswatini              | X          | X       |             | X           | X         | X                | X           |                | X          | X  | X                    | X                   |                 |         |           |            |
| Ghana                 |            |         |             | X           | X         | X                |             | X              |            |    |                      |                     |                 |         |           |            |
| Guyana                | X          | X       |             | X           | X         | X                | X           | X              |            |    |                      |                     |                 |         | X         | X          |
| Indonesia             | X          | X       | X           |             |           | X                | X           |                |            |    |                      |                     | X               | X       |           |            |
| Kenya                 | X          | X       |             | X           | X         | X                | X           |                | X          | X  | X                    | X                   |                 | X       |           |            |
| Malawi                | X          | X       |             |             |           | X                | X           |                |            |    |                      |                     |                 |         |           |            |
| Nepal                 |            |         |             |             |           | X                | X           |                |            |    | X                    |                     |                 |         |           |            |
| Nigeria               | X          | X       | X           |             |           | X                | X           | X              |            |    |                      |                     |                 |         |           |            |
| Norway*               |            |         |             |             |           |                  |             |                |            |    |                      |                     |                 |         |           |            |
| South Sudan           | X          | X       |             | X           | X         | X                | X           |                |            |    | X                    | X                   |                 |         |           | X          |
| Sweden                |            |         |             |             |           |                  |             |                |            |    |                      |                     |                 |         |           | X          |
| Tanzania              | X          | X       | X           |             |           | X                | X           |                |            |    |                      |                     | X               |         |           |            |
| Uganda                | X          | X       |             | X           | X         | X                | X           |                | X          | X  | X                    |                     |                 |         |           | X          |
| United States         |            | X       |             | X           | X         | X                | X           |                |            |    |                      |                     |                 | X       | X         |            |
| West Bank - Palestine | X          | X       | X           | X           | X         |                  |             |                |            |    |                      |                     |                 |         |           | X          |
| Zambia                | X          | X       | X           |             |           | X                | X           | X              |            |    | X                    | X                   |                 | X       |           |            |
| Zimbabwe              | X          | X       |             | X           | X         | X                | X           |                | X          | X  | X                    |                     |                 | X       |           | X          |

274 \* Norway's electronic pregnancy register did not have data on laboratory tests performed during pregnancy; probably these data are captured through a  
 275 different system.

276

277



278 **Table 5: Childbirth information**

| Country               | Onset of delivery | Date of Delivery | Time of Delivery | Duration of labour | Use of Uterotonic | Pantograph used | Mode of Delivery |
|-----------------------|-------------------|------------------|------------------|--------------------|-------------------|-----------------|------------------|
| Afghanistan           | X                 | X                | X                |                    | X                 |                 | X                |
| Argentina             |                   |                  |                  |                    | X                 |                 |                  |
| Bolivia               |                   |                  |                  |                    |                   |                 | X                |
| Eswatini              |                   | X                | X                |                    |                   |                 | X                |
| Ghana                 |                   |                  |                  |                    | X                 |                 | X                |
| Guyana*               |                   |                  |                  |                    |                   |                 |                  |
| Indonesia             | X                 | X                | X                |                    | X                 | X               | X                |
| Kenya                 |                   | X                | X                | X                  | X                 |                 | X                |
| Malawi                | X                 |                  |                  |                    | X                 |                 |                  |
| Nepal                 | X                 |                  |                  |                    |                   |                 |                  |
| Nigeria               |                   | X                | X                |                    | X                 | X               | X                |
| Norway                | X                 | X                | X                | X                  |                   |                 | X                |
| South Sudan           | X                 |                  |                  |                    | X                 |                 |                  |
| Sweden                | X                 | X                | X                |                    |                   | X               | X                |
| Tanzania              | X                 | X                | X                | X                  | X                 |                 | X                |
| Uganda                |                   | X                |                  |                    | X                 |                 | X                |
| West Bank - Palestine |                   |                  |                  |                    |                   |                 | X                |
| Zambia                | X                 | X                | X                | X                  | X                 | X               | X                |

279 \* Guyana register did not capture data on any of the six key data elements related to childbirth, but had space to  
 280 capture data on name of the service provider and other treatments. Burkina Faso and Zimbabwe did not have  
 281 childbirth registers to be analyzed.

282  
 283

284 *PMTCT during childbirth*

285 The labor and delivery period is another window of opportunity to implement PMTCT, similar to  
 286 the pregnancy period. However, documentation of HIV status of the mother is not commonly  
 287 included in many maternity or childbirth registers. In this review, five countries (Afghanistan,  
 288 Eswatini, Guyana, Kenya, and Malawi) capture data on either HIV testing at delivery or the HIV  
 289 status at admission. Partner HIV status is even less documented, only in Kenya and Malawi.  
 290 Similarly, very few countries document HIV testing for the baby, CD4 count and viral load

291 monitoring of the mother in the childbirth registers (only Kenya and Uganda). Guyana and  
292 Kenya are the only countries that record syphilis testing in childbirth.

### 293 *Best practices in newborn care*

294 The newborn's first hour of life requires key lifesaving interventions to implemented immediately  
295 postpartum to ensure the survival of the baby. For newborns experiencing difficulty in breathing at  
296 birth, resuscitation is documented in eight countries while breastfeeding within the first hour is  
297 recorded in six countries out of the 18 childbirth registers reviewed. The practice of skin-to-skin is  
298 documented in Kenya, and immediate cord care through application of either chlorohexidine or  
299 chloramphenicol is recorded in Ghana, Kenya, and Nigeria.

300

301 In 15 out of the 18 countries, live births are clearly recorded, distinguishing them from fetal and  
302 newborn death. The sex and weight of the baby are recorded in 10 and 12 countries, respectively. The  
303 Apgar score is recorded in 10 countries, with most of them categorizing by the time the assessment was  
304 done; one, five, or 10 minutes after birth. Recording of birth deformities is done in five countries as  
305 shown in table 6.

306 **Table 6: Newborn care during the first hour of life**

| Country*    | Resuscitation needed or performed | Skin to skin | Cord care | Eye care (e.g Tetracycline) | Immunization (e.g. BCG) | ART/ NVP | Vit. K inj. | Breastfed within an hour |
|-------------|-----------------------------------|--------------|-----------|-----------------------------|-------------------------|----------|-------------|--------------------------|
| Argentina   | X                                 |              |           |                             |                         |          |             |                          |
| Ghana       | X                                 |              | X         | X                           |                         |          |             |                          |
| Guyana      | X                                 |              |           |                             | X                       |          |             | X                        |
| Kenya       |                                   | X            | X         | X                           | X                       | X        | X           | X                        |
| Malawi      | X                                 |              |           |                             | X                       |          |             | X                        |
| Nigeria     | X                                 |              | X         |                             |                         |          |             | X                        |
| South Sudan |                                   |              |           | X                           | X                       |          |             | X                        |
| Sweden      | X                                 |              |           |                             |                         |          | X           |                          |
| Tanzania    | X                                 |              |           |                             |                         | X        |             | X                        |
| Uganda      | X                                 | X            | X         |                             | X                       | X        | X           | X                        |
| Zambia      | X                                 |              |           |                             |                         |          |             | X                        |

307 \* The seven countries whose childbirth registers were analyzed that are not shown in table 6 because the registers  
 308 do not capture data on any of the eight data elements related to newborn care during the first hour of birth, are:  
 309 Afghanistan, Bolivia, Eswatini, Guyana, Indonesia, Nepal, and Norway.

310

311 *Services provided to mother prior to discharge*

312 Health promotion intervention provided to the mother prior to discharge include counseling on  
 313 infant and young child feeding in Afghanistan, Nigeria, Norway, and Tanzania. Regarding family  
 314 planning counseling, only three countries capture these data (Bolivia, Nigeria, and Tanzania).  
 315 Distinction is made in Zambia between exclusive breastfeeding (EBF), replacement feeding (RF),  
 316 and mixed feeding (MF). In Tanzania, the type of postpartum family planning method selected  
 317 by the woman is documented. In some registers, the level of detail includes whether the  
 318 method is provided pre-discharge.

## 319 **Mortality and Newborn Outcomes**

320 Childbirth or labour and delivery registers are the sources of data on maternal and newborn  
321 outcomes. Results from the analysis of maternal and neonatal death as presented for the same  
322 18 countries.

### 323 *Maternal death*

324 In 14 out of 18 countries (78%), data on the status of mother at discharge (alive or died) are  
325 captured in separate columns, except for Nigeria, Sweden, and Uganda, where “maternal  
326 death” column is not included as a separate column. Data of mothers who dies are captured  
327 through an open text field. About In about half of the countries, there is open-ended space to  
328 record the cause of death, the last column in the register. In some other countries like in  
329 Tanzania, maternal deaths are recorded under “discharge” summary, the status of the mother  
330 being designated as either alive or dead.

331

### 332 *Fetal and newborn death*

333 Where the death of the baby occurs before birth, this is recorded as fetal death. Nigeria and  
334 Norway have codes to record abortion. Regarding stillbirths, 11/18 (61%) of the countries  
335 distinguish between fresh and macerated stillbirths. Bolivia and Malawi do not make such  
336 distinctions, although stillbirths are reported (Table 7). The timing of newborn death is  
337 recorded in different ways across the registers. Half the countries document early death  
338 occurring less than 7 days after delivery. In Norway which uses an electronic register, there are  
339 separate codes for recording early neonatal death ( less than7 days) versus death occurring

340 after 7 days, but before 28 days. South Sudan and Zambia have spaces to record newborn  
341 deaths whose timing is unspecified (Table 7).

342 **Table 7: Abortion, fetal and early death of the newborn**

| Country      | Abortion | Stillbirth Fresh & Macerated (Combined) | Stillbirth-Fresh | Stillbirth-Macerated | Neonatal death (unspecified) | Early death (<7 days) | Death <28 days | Cause of death |
|--------------|----------|-----------------------------------------|------------------|----------------------|------------------------------|-----------------------|----------------|----------------|
| Afghanistan  |          |                                         | X                | X                    |                              | X                     |                | X              |
| Argentina    |          |                                         |                  |                      |                              |                       |                |                |
| Bolivia      |          | X                                       |                  |                      |                              |                       |                |                |
| Burkina Faso |          |                                         |                  |                      |                              | X                     |                |                |
| Eswatini     |          |                                         | X                | X                    |                              | X                     |                |                |
| Ghana        |          |                                         |                  | X                    |                              | X                     |                |                |
| Guyana       |          |                                         | X                |                      |                              |                       |                |                |
| Indonesia    |          |                                         |                  |                      |                              |                       |                |                |
| Kenya        |          |                                         | X                | X                    |                              | X                     |                |                |
| Malawi       |          | X                                       |                  |                      |                              | X                     |                |                |
| Nepal        |          |                                         | X                | X                    |                              |                       |                |                |
| Nigeria      | X        |                                         | X                | X                    |                              | X                     |                |                |
| Norway       | X        |                                         | X                | X                    |                              | X                     | X              | X              |
| South Sudan  |          |                                         | X                | X                    | X                            |                       |                |                |
| Sweden       |          |                                         | X                | X                    |                              | X                     |                |                |
| Tanzania     |          |                                         | X                | X                    |                              |                       |                | X              |
| Uganda       |          |                                         |                  |                      |                              |                       |                |                |
| Zambia       |          |                                         | X                | X                    | X                            |                       |                | X              |

343

344 **Postnatal Care**

345 *Utilization and timing of postnatal care visits post-discharge*

346 Some countries record the date of the visit and the date of birth therefore making it possible to  
 347 calculate the visit timing. In countries using cross-sectional registers, service providers count  
 348 the number of visits from a mother-held record, the number of the visits a woman has  
 349 attended, then enter the visit number in the postnatal care register. The timing of the PNC visit

350 was categorized as day of birth or immediate care after birth, within 48 hours or day 2, day3-6,  
351 days 7-14, and at six weeks (Table 16). The schedule of reporting varied widely across countries,  
352 with countries like Zambia using incredibly detailed schedule as follows: 1<sup>st</sup> hour, 6<sup>th</sup> hour, 12<sup>th</sup>  
353 hour, 18<sup>th</sup> hour, 24<sup>th</sup> hour, 48<sup>th</sup> hour, 6<sup>th</sup> day, and 6<sup>th</sup> week. In some countries, the timing of the  
354 visit was unspecified.

355

### 356 *Routine checks during postnatal period*

357 Routine clinical checks, counseling, laboratory tests are done on the mother while the child  
358 receives immunization and routine checks. Blood pressure is recorded in PNC registers of five of  
359 the countries reviewed, while complications related to childbirth are recorded in seven  
360 countries. Some of the complications documented are postpartum haemorrhage, lochia  
361 (excessive or foul smelling), and presence of a fistula. Examination of the site of cesarean  
362 section is recorded in Zambia and Kenya). The mother's hemoglobin level is recorded as such or  
363 anaemia/ pallor. Some of the less commonly documented practices include examination of the  
364 vagina, breast, and the uterus.

365

### 366 *Screening and counseling services*

367 The most common type of counseling services during postnatal visits is on family planning and  
368 nutrition counseling for both the mother and the baby. Nutrition counseling includes  
369 information on EBF, RF, and MF. Micronutrient supplementation provided mainly iron and  
370 foliate is recorded in 9/13 (70%) of the countries whose PNC registers were analyzed.

371 Postpartum family planning is recorded in 8/13 (62%) of the countries. Screening for TB,  
 372 cervical cancer, and STIs is recorded in 3, 2, and 1, countries, respectively.

373 *PMTCT during the postnatal period*

374 The postnatal period provides another opportunity for PMTCT so that infants born to HIV-  
 375 infected mother remain uninfected. HIV testing is recorded in the PNC registers of six of the  
 376 countries analyzed while information on whether the mother is on ART is recorded in five  
 377 countries. Couple testing and the HIV status of the mother’s partner is recorded in Kenya and  
 378 Zambia only (Table 8).

379

380 **Table 8: HIV Testing and treatment services**

| Country      | HIV status | HIV testing | Couple HTC | Partner HIV status | HIV results on arrival | HIV results (<6wks)/ or at discharge | On ART | On CTX |
|--------------|------------|-------------|------------|--------------------|------------------------|--------------------------------------|--------|--------|
| Afghanistan  | X          | X           |            |                    |                        |                                      | X      | X      |
| Burkina Faso | X          | X           |            |                    |                        |                                      |        |        |
| Eswatini     | X          | X           |            |                    | X                      | X                                    | X      | X      |
| Kenya        | X          | X           | X          | X                  | X                      | X                                    | X      |        |
| South Sudan  | X          | X           |            |                    | X                      |                                      | X      | X      |
| Tanzania     | X          | X           |            |                    |                        |                                      |        |        |
| Zambia       |            |             | X          | X                  |                        |                                      | X      |        |

381

382 *Postnatal care for the newborn*

383 In addition to documenting the immunizations provided to the newborn so that she or he is on  
 384 schedule as per the national immunization schedule, routine checks primary focus on newborn  
 385 danger signs or complications such as jaundice and failure to gain weight as expected. PNC  
 386 registers of five of the countries included in the analysis record newborn danger signs.



387 Regarding preventing HIV infection, ART prophylaxis for the newborn is recorded in four  
388 countries (Afghanistan, Eswatini, Tanzania, and Zambia), and it is only in Eswatini where  
389 provision of early infant male circumcision is recorded.

390 *Sub-analysis of registers from Ghana, Kenya, Nigeria, and Zambia*

391 Results of analysis of registers from four countries (Ghana, Kenya, Nigeria, and Zambia) where  
392 the 2017/2018 and 2019/2020 versions of the registers were available showed that there is an  
393 apparent change towards inclusion of data elements that are critical in the computation of key  
394 maternal and newborn care indicators. Overall, 21/27(78%) key data elements for tracking  
395 maternal and newborn care are present in the latest versions of the registers reviewed (Table  
396 9). The ones that are present in to varying degrees are: ANC visits <12 weeks, fetal heart rate,  
397 patograph use, newborn resuscitation, breast/ Cervical cancer screening and contraception  
398 counseling.

399 **Table 9: Comparison of 2018 to 2020 register review form four countries**

| Category          | #  | Indicator / Data element                               | Ghana |      | Kenya |      | Nigeria |      | Zambia |      | Present in all 4 countries (2020) |
|-------------------|----|--------------------------------------------------------|-------|------|-------|------|---------|------|--------|------|-----------------------------------|
|                   |    |                                                        | 2018  | 2020 | 2018  | 2020 | 2018    | 2020 | 2018   | 2020 |                                   |
| Antenatal care    | 1  | Antenatal client first visit before 12 weeks gestation |       | ✓    |       | ✓    |         |      |        | ✓    |                                   |
|                   | 2  | Antenatal care 4th visit                               | ✓     | ✓    | ✓     | ✓    | ✓       | ✓    | ✓      | ✓    | ✓                                 |
|                   | 3  | Antenatal care 8th visit                               |       | ✓    |       | ✓    |         | ✓    |        | ✓    | ✓                                 |
|                   | 4  | Syphilis screening                                     | ✓     | ✓    | ✓     | ✓    | ✓       | ✓    | ✓      | ✓    | ✓                                 |
|                   | 5  | Syphilis test result / Treatment                       |       | ✓    | ✓     | ✓    | ✓       | ✓    | ✓      | ✓    | ✓                                 |
|                   | 6  | Haemoglobin measured                                   | ✓     | ✓    | ✓     | ✓    | ✓       | ✓    | ✓      | ✓    | ✓                                 |
|                   | 7  | Blood pressure measurement                             | ✓     | ✓    | ✓     | ✓    | ✓       | ✓    | ✓      | ✓    | ✓                                 |
|                   | 8  | Fetal heart rate                                       | ✓     | ✓    |       |      |         |      |        |      |                                   |
|                   | 9  | Tetanus vaccination                                    | ✓     | ✓    | ✓     | ✓    | ✓       | ✓    | ✓      | ✓    | ✓                                 |
|                   | 10 | PMTCT - HIV testing                                    | ✓     | ✓    | ✓     | ✓    | ✓       | ✓    | ✓      | ✓    | ✓                                 |
|                   | 11 | IPTp-1 for malaria during pregnancy                    | ✓     | ✓    | ✓     | ✓    | ✓       | ✓    | ✓      | ✓    | ✓                                 |
|                   | 12 | IPTp-2 for malaria during pregnancy                    | ✓     | ✓    | ✓     | ✓    | ✓       | ✓    | ✓      | ✓    | ✓                                 |
|                   | 13 | IPTp-3+ for malaria during pregnancy                   | ✓     | ✓    |       | ✓    |         | ✓    | ✓      | ✓    | ✓                                 |
|                   | 14 | Iron supplementation / Nutrition                       | ✓     | ✓    | ✓     | ✓    | ✓       | ✓    | ✓      | ✓    | ✓                                 |
| Childbirth        | 15 | Partograph used to monitor labour                      |       |      |       |      |         | ✓    |        | ✓    |                                   |
|                   | 16 | Uterotonic for prevention of post-partum haemorrhage   | ✓     | ✓    | ✓     | ✓    | ✓       | ✓    | ✓      | ✓    | ✓                                 |
|                   | 17 | Newborn resuscitation / Asphyxia                       |       | ✓    |       |      | ✓       | ✓    | ✓      | ✓    |                                   |
|                   | 18 | Mode of delivery/ Caesarean section                    | ✓     | ✓    | ✓     | ✓    | ✓       | ✓    | ✓      | ✓    | ✓                                 |
|                   | 19 | Birthweight/ Low birth birthweight                     | ✓     | ✓    | ✓     | ✓    | ✓       | ✓    |        | ✓    | ✓                                 |
|                   | 20 | Newborns breastfed within one hour of birth            |       | ✓    | ✓     | ✓    |         | ✓    | ✓      | ✓    | ✓                                 |
| Postnatal care    | 21 | Post-partum hemorrhage check/ management               |       | ✓    | ✓     | ✓    | ✓       | ✓    | ✓      | ✓    | ✓                                 |
|                   | 22 | Breast /Cervical Cancer Screening                      |       |      |       | ✓    |         |      | ✓      | ✓    |                                   |
|                   | 23 | PMTCT - HIV testing                                    | ✓     |      | ✓     | ✓    | ✓       | ✓    | ✓      | ✓    | ✓                                 |
|                   | 24 | Contraception /FP counseling or issued                 | ✓     | ✓    | ✓     | ✓    |         | ✓    | ✓      | ✓    |                                   |
| Maternal Outcomes | 25 | Stillbirth                                             | ✓     | ✓    | ✓     | ✓    | ✓       | ✓    | ✓      | ✓    | ✓                                 |
|                   | 26 | Maternal death or other outcome                        | ✓     | ✓    | ✓     | ✓    | ✓       | ✓    | ✓      | ✓    | ✓                                 |
|                   | 27 | Neonatal death or other outcome                        | ✓     | ✓    | ✓     | ✓    | ✓       | ✓    | ✓      | ✓    | ✓                                 |

400

## 401 **Discussion**

402 This analysis reviews the registers for ANC, childbirth, and PNC for 21 countries in six regions  
403 conducted through abstracting data elements from ANC, childbirth, and PNC registers with a  
404 focus on evidence-based interventions as well as outcomes for the woman and newborn.  
405 Overall, there is great variation in the number of data elements ranging from 24 in Nepal's  
406 childbirth register to 188 in Eswatini's ANC register, as well as the types of elements that were  
407 captured. Countries forms also varied in terms of longitudinal versus cross-sectional data  
408 collection depending on the country context. This review has demonstrated lack of  
409 harmonization and consistency in the types of information that are collected, how they are  
410 collected and organized or recorded. Given that these registers the main source of maternal and  
411 newborn data, information gathered plays a key role in programme planning and tracking  
412 progress towards achieving national and global goals and targets.

413 Majority of the ANC registers reviewed for 20 countries capture routine information for prenatal  
414 care, such as gestation age, weight, height, blood pressure, and haemoglobin level. However,  
415 there were either gaps in capturing key data as per the 2016 WHO recommendations<sup>29</sup> or lack of  
416 consistency in the data capture, for example on number of contacts or clinic visits, dietary  
417 interventions, and fetal assessment. Overall, few countries recorded eight or more ANC visits or  
418 having first ANC visit before 12 weeks gestation. Most of those recording eight or more ANC visits  
419 are the ones who have electronic registries, suggesting that use of electronic medical records  
420 provides an opportunity for a better tracking of ANC services. It's noteworthy that the majority  
421 of registers (65%) included relevant medical history for the pregnant woman, although only one  
422 third included complications from previous pregnancies. Most countries captured recommended

423 screening practices such as blood pressure measurement, hemoglobin levels and syphilis and HIV  
424 screening and treatment. However, only one third of registers captured whether an ultrasound  
425 was performed. In addition, the registers capture screening but not if any action was taken to  
426 address risk factors. For childbirth, the majority of countries capture data on obstetric  
427 complications, but few do preventative or management interventions for postpartum  
428 hemorrhage or pre-eclampsia. Although there is evidence of documentation of key data on  
429 childbirth, it is possible that some other supplemental documents such as the partograph, which  
430 is a recommended by WHO for capturing data during active labour to inform care<sup>29</sup>.

431 Regarding childbirth and PNC period, few countries tracked whether the partograph was used or  
432 fetal heart monitoring. Furthermore, data on breastfeeding within one hour of birth, newborn  
433 resuscitation and BCG immunization were also not routinely captured in most countries. The  
434 PNC registers had the fewest data elements available and the least standardization in terms of  
435 what was captured for the woman or newborn. In general, there was more information captured  
436 for the woman than for the newborn, especially around nutrition and family planning, with  
437 information for newborns focused on immunization and routine checks.

438 In a sub-analysis of four African countries, there was some improvement over time in terms of  
439 the types of data elements collected. These countries track the same data elements in ANC  
440 registries because of epidemiological reasons (e.g. HIV testing, STIs screening or Malaria  
441 treatment), however a great variation of information has been found in childbirth and PNC  
442 registers from these countries. Several of the newer data elements included newborn care  
443 indicators as recommended by the Every Newborn Action Plan.

444 There were limitations to the study. First, although every effort was made to obtain the most  
445 recent registers, these documents were not always available for all selected countries. In  
446 addition, many of the data elements reviewed were relevant to only a sub-set of countries (e.g.  
447 malaria prevention and HIV prevention and management). It was often difficult to interpret how  
448 the registers were supposed to be completed and it was not always possible to obtain  
449 instructions for completing the them, if at all they existed. Finally, we were only able to conduct  
450 a sub-analysis of four countries to assess change over time, due to limitations in obtaining the  
451 relevant registers from more countries. It would be helpful to expand this analysis to additional  
452 countries and to include the data summary forms.

453 Although there are global recommendations for maternal and newborn indicators to be collected  
454 within routine data systems<sup>29-31</sup>, this analysis highlights the great variation among and between  
455 countries. There is a need for additional guidance, standardization, and reduction of data  
456 elements to capture the most important evidence-based practices for improving the quality of  
457 care as well as tracking progress toward national and global targets. This analysis did not capture  
458 the burden on health care workers to collect these data elements in addition to providing quality  
459 care, but it is an essential consideration when selecting and updating registers and forms for  
460 routine data systems.

461 Improving the quality and consistency of data reported through a national HIS, requires a  
462 thorough understanding of facility registers with respect to how data recorded in facilities can be  
463 most easily translated into aggregate indicators. Taking these factors into consideration when  
464 designing a register allows for more accurate reporting and for inclusion of indicators that

465 provide information on quality of care, such as number of service contacts and timing of  
466 interventions received.

## 467 **Conclusion**

468 The ANC, childbirth and PNC registers are a major source of essential maternal and newborn  
469 data, but standardization in recording of data elements varies across countries. Managers and  
470 frontline health workers use these data to monitor the performance of their national health  
471 system and to guide the continuous improvement of health care services for women and  
472 newborns. The results of this analysis will complement additional work and help to inform the  
473 standardization of global indicators and provide information for other countries seeking to  
474 introduce indicators in their health systems.

475

## 476 **Acknowledgement**

477 This work was commissioned by the WHO and supported by the Bill & Melinda Gates Foundation.  
478 Special thanks to the Ministry of health officials and Jhpiego staff working in the 21 countries  
479 whose registers were analyzed for facilitating the availability of registers.

## 480 References

- 481 1. WHO. *Maternal Mortality*. World Health Organization. Accessed March 20,  
482 2022. [https://www.who.int/en/news-room/fact-sheets/detail/maternal-](https://www.who.int/en/news-room/fact-sheets/detail/maternal-mortality)  
483 [mortality](https://www.who.int/en/news-room/fact-sheets/detail/maternal-mortality)
- 484 2. UNICEF, WHO, UNFPA, World Bank Group, United Nations Population  
485 Division, *A Neglected Tragedy: The Global Burden of Stillbirths*. New York;  
486 2021. Accessed on March 21, 2022. [https://www.who.int/publications](https://www.who.int/publications/m/item/a-neglected-tragedy-the-global-burden-of-stillbirths)  
487 [/m/item/a-neglected-tragedy-the-global-burden-of-stillbirths](https://www.who.int/publications/m/item/a-neglected-tragedy-the-global-burden-of-stillbirths)
- 488 3. Lawn J, Shibuya K, Stein C. LAWN, J.; SHIBUYA, K.; STEIN, C. No cry at birth-  
489 global estimates of intrapartum stillbirths and intrapartum-related neonatal  
490 deaths. *Bull World Health Organ*, v. 83, n. 6, p. 409-417, 2005.
- 491 4. Frøen, F., Lawn, J., & Haezcell, A. (2016). Ending preventable stillbirths. An  
492 executive summary for The Lancet's series. *Lancet*, 1-8.  
493
- 494 5. Kruk ME, Gage A, Arsenault C, Jordan K, Leslie H, Roder-DeWan S, et al.  
495 High-quality health systems in the Sustainable Development Goals era: time  
496 for a revolution. *Lancet Glob Health*, 2018;6(11)
- 497 6. FUnited Nations. *Annex: Global Indicator Framework for the Sustainable*  
498 *Development Goals and Targets of the 2030 Agenda for Sustainable*  
499 *Development.*; 2019.
- 500 7. Every Woman Every Child. *Indicator and Monitoring Framework for the*  
501 *Global Strategy for Women's, Children's, and Adolescents' Health (2016-*  
502 *2030)*; 2016.
- 503 8. Wagenaar BH, Sherr K, Fernandes Q, Wagenaar AC. Using routine health  
504 information systems for well-designed health evaluations in low- and  
505 middle-income countries. *Health Policy Plan*. 2016;31(1):129-135.
- 506 9. AbouZahr C. Special Theme – Health Information Systems. *Bull World Health*  
507 *Organ*. 2005;83(8).
- 508 10. Hall LH, Johnson J, Watt I, Tsipa A, O'Connor DB. Healthcare staff wellbeing,  
509 burnout, and patient safety: A systematic review. *PLoS One*. 2016;11(7). :
- 510 11. Bhattacharya AA, Allen E, Umar N, et al. Monitoring childbirth care in  
511 primary health facilities: a validity study in Gombe State, northeastern  
512 Nigeria. *J Glob Health*. 2019;9(2):020411.

- 513 12. Landry E, Pett C, Fiorentino R, Ruminjo J, Mattison C. Assessing the quality  
514 of record keeping for cesarean deliveries: Results from a multicenter  
515 retrospective record review in five low-income countries. *BMC Pregnancy*  
516 *Childbirth*. 2014;14(1):1-11.
- 517 13. MCSP. *What Data on Maternal and Newborn Health Do National Health*  
518 *Management Information Systems Include?*; 2018.
- 519 14. MCSP. *What Data on Family Planning Are Included in National HMIS? A*  
520 *Review of Data Elements for 18 Low- Lower-Middle-Income Countries.*; 2019.
- 521 15. Sychareun V, Hansana V, Phengsavanh A, Chaleunvong K, Eunyong K,  
522 Durham J. Data verification at health centers and district health offices in  
523 Xiengkhouang and Houaphanh Provinces, Lao PDR. *BMC Health Serv Res*.  
524 2014;14(1):1-10.
- 525 16. Anwar J, Torvaldsen S, Sheikh M, Taylor R. Under-estimation of maternal  
526 and perinatal mortality revealed by an enhanced surveillance system:  
527 Enumerating all births and deaths in Pakistan. *BMC Public Health*.  
528 2018;18(1):1-14.
- 529 17. Mallick L, Temsah G, Namaste S, Dontamsetti T, and Wang W. 2020. *Using*  
530 *Health Management Information Systems Data to Contextualize Survey-*  
531 *based Estimates of Fertility, Mortality, and Wasting*. DHS Occasional Paper  
532 No. 12. Rockville, Maryland, USA: ICF.
- 533 18. Measure Evaluation. *Performance of Routine Information System*  
534 *Management (PRISM) Toolkit.*; 2019.
- 535 19. World Health Organization. *Analysis and Use of Health Facility Data:*  
536 *Guidance for HIV Programme Managers.*; 2018.  
537 [https://www.who.int/healthinfo/FacilityAnalysisGuide\\_HIV.pdf](https://www.who.int/healthinfo/FacilityAnalysisGuide_HIV.pdf)
- 538 20. WHO and JSI. *Data Quality Review: Frameworks and Metrics*. Vol NLM  
539 classi.; 2017. doi:978 92 4 159829 3
- 540 21. DHIS2. DHIS2. Accessed July 30, 2020. <http://www.dhis2.org>
- 541 22. Bhattacharya AA, Umar N, Audu A, Allen E, Schellenberg JRM, Marchant T.  
542 Quality of routine facility data for monitoring priority maternal and newborn  
543 indicators in DHIS2: A case study from Gombe State, Nigeria. *PLoS One*.  
544 2019;14(1):1-21.



- 545 23. Government of Sweden. The Swedish Pregnancy Register. Accessed July 15,  
546 2020. <https://www.medscinet.com/gr/engelska.aspx>
- 547 24. Stephansson O, Petersson K, Björk C, Conner P, Wikström AK. The Swedish  
548 Pregnancy Register – for quality of care improvement and research. *Acta*  
549 *Obstet Gynecol Scand*. 2018;97(4):466-476.
- 550 25. Irgens LM. The Medical Birth Registry of Norway. Epidemiological research  
551 and surveillance throughout 30 years. *Acta Obstet Gynecol Scand*.  
552 2000;79(6):435-439.
- 553 26. Schmidt M, Schmidt SAJ, Adelborg K, et al. The Danish health care system  
554 and epidemiological research: From health care contacts to database  
555 records. *Clin Epidemiol*. 2019;11:563-591.
- 556 27. MCHIP. *A Review of the Maternal and Newborn Health Content of National*  
557 *Health Management Information Systems in 13 Countries in Sub-Saharan*  
558 *Africa and South Asia.*; 2014.
- 559 28. Axelsson O. The Swedish Medical Birth Register. *Acta Obstet Gynecol Scand*.  
560 2003;82(6):491-492.
- 561 29. World Health Organization: *WHO Recommendations on Antenatal Care for a*  
562 *Positive Pregnancy Experience*. Geneva: World Health Organization;2016.
- 563 30. World Health Organisation. *WHO recommendations for augmentation of*  
564 *labour*. Geneva: WHO; 2014.
- 565 31. WHO and UNICEF. *Analysis and use of health facility data – Guidance for*  
566 *RMNCAH programme managers*. Geneva: World Health Organization, 2019
- 567

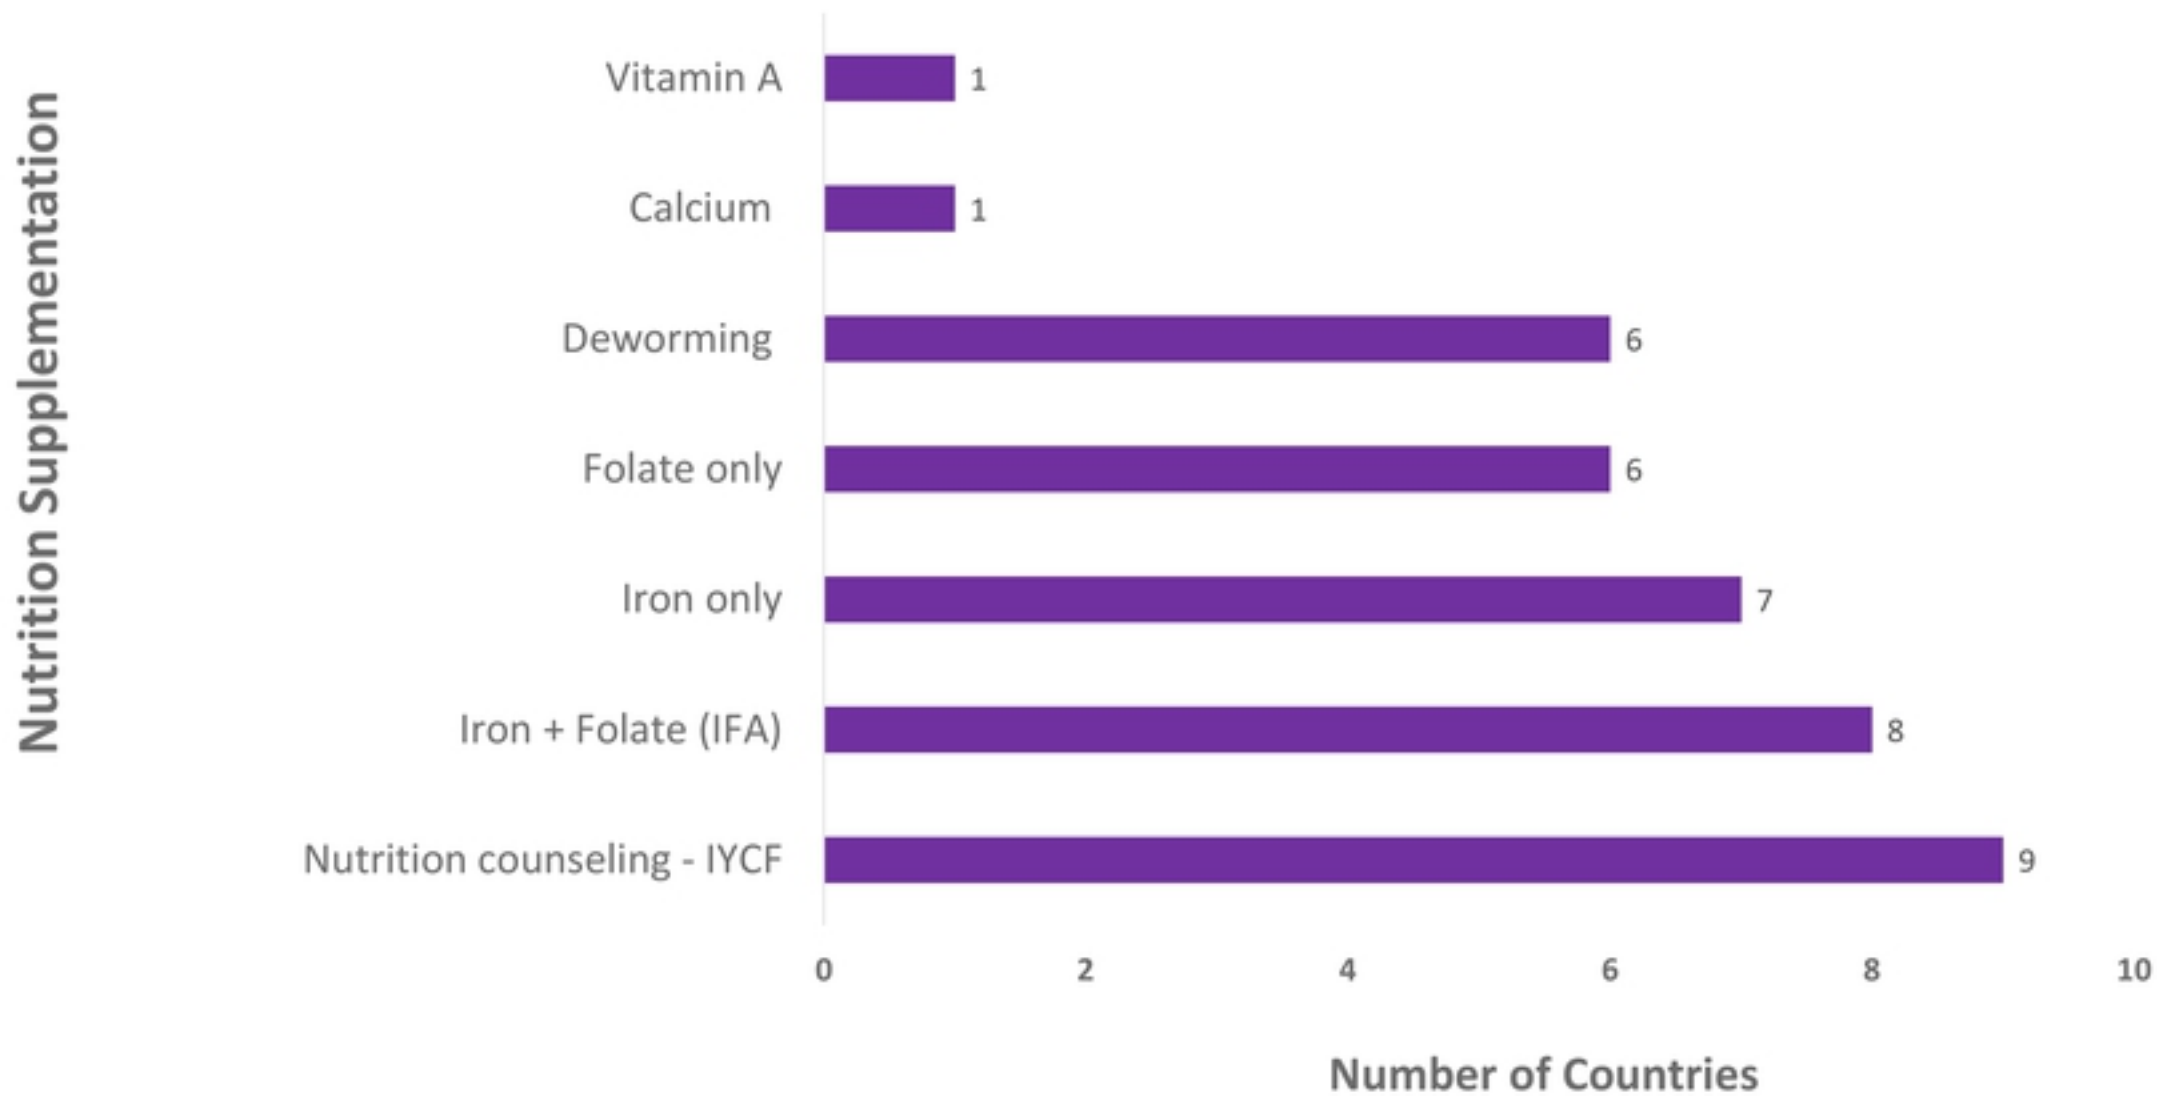

Figure 2\_Nutrition supplementation and counseling

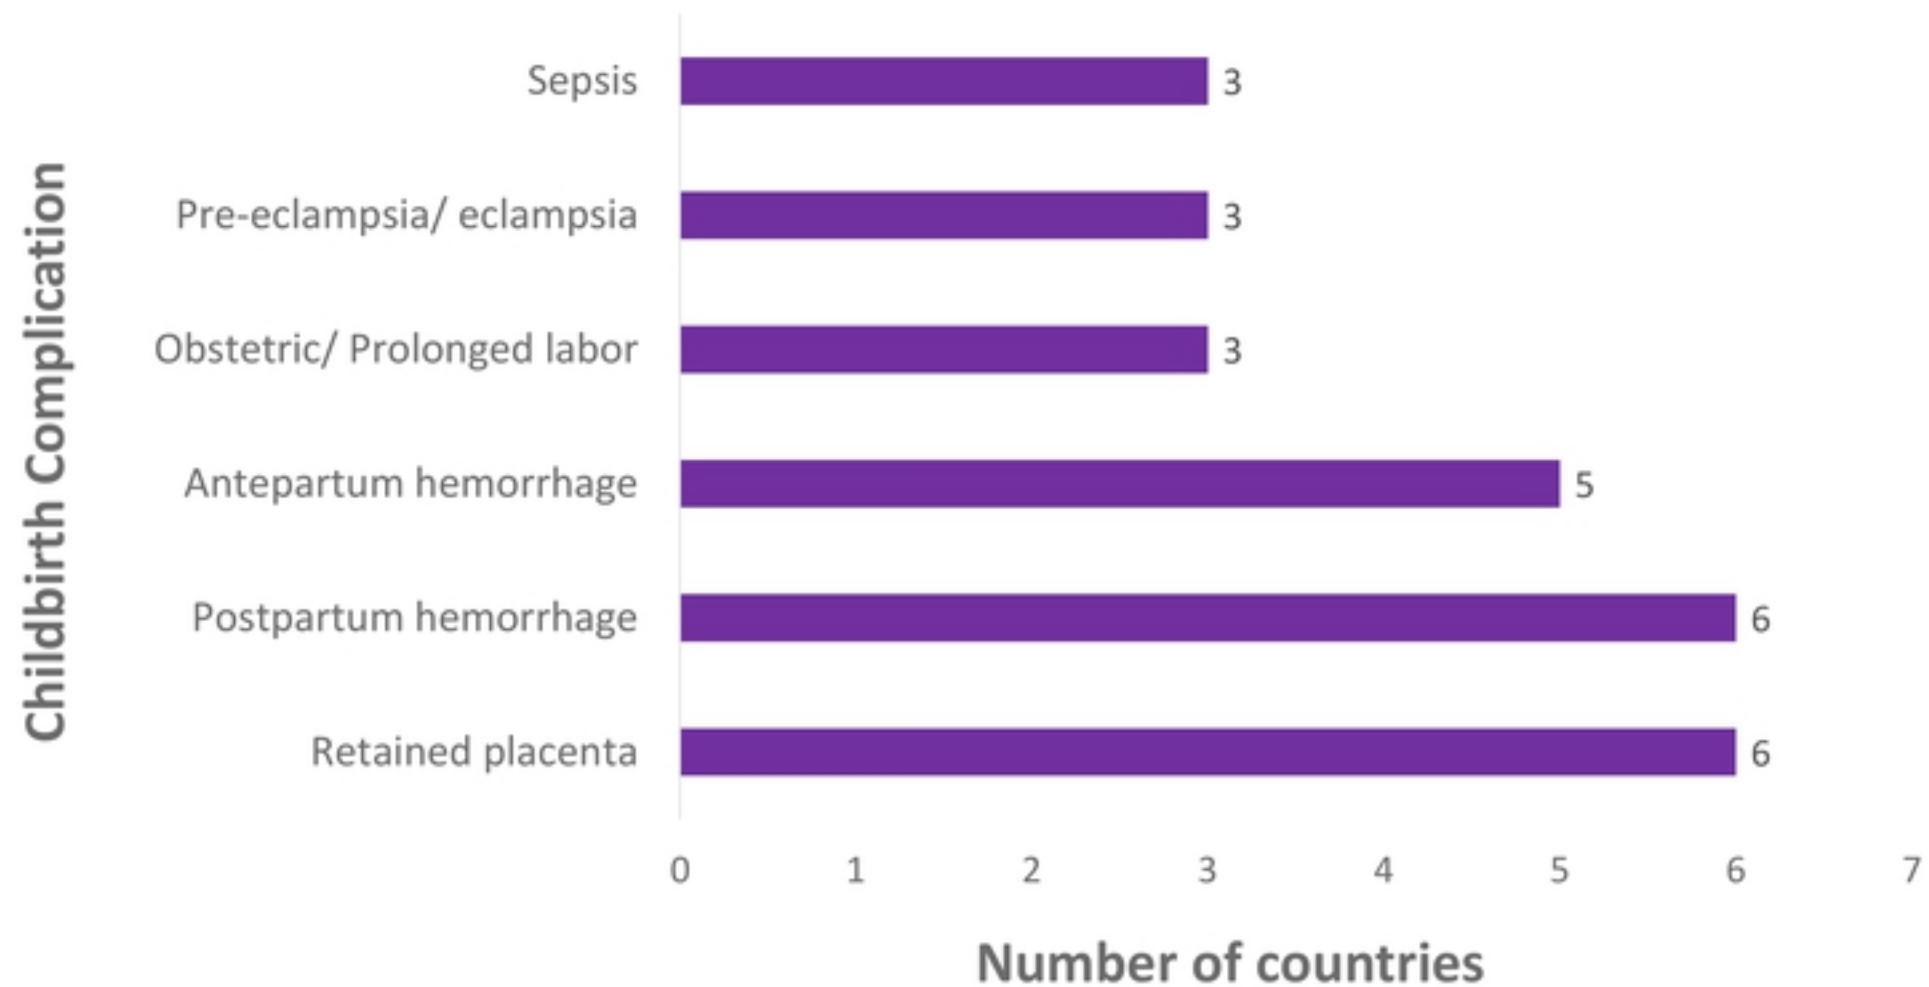

Figure 3\_Maternal complications of childbirth

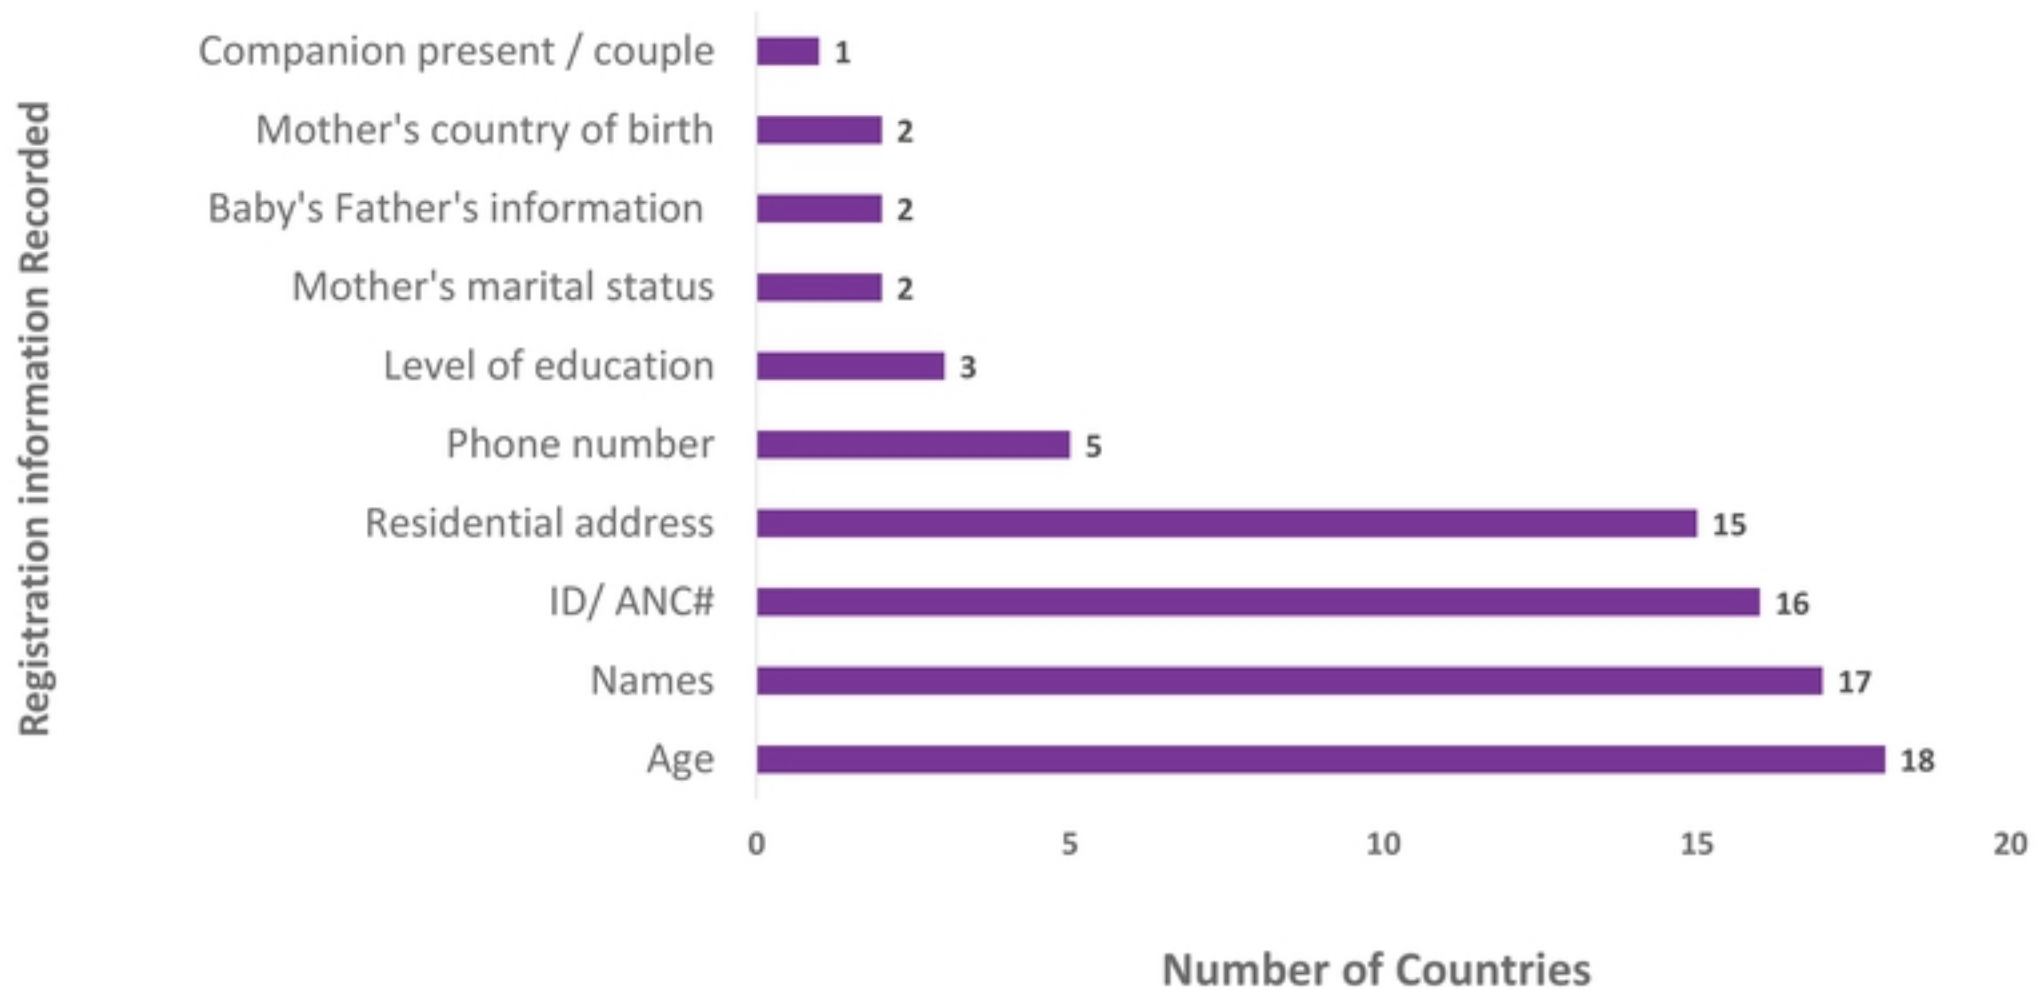

Figure 1-Client registration information
